# Supplementary material
Source: Springer Nature journal article supplement (https://www.springermedizin.de/resource/supplementary/12885_2011_2931_MOESM8_ESM.pdf/9462274)

**Tumor volume mm<sup>3</sup>  
(mean  $\pm$  SE)**

- Vehicle
- △ TZ 2.5
- ▲ TZ 5
- ▴ TZ 10
- ▲ TZ 20

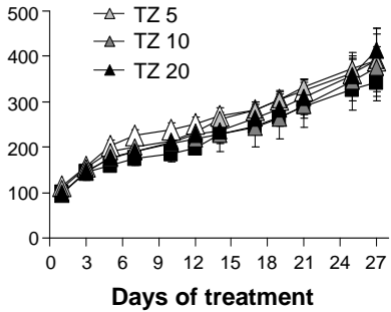

Supplement: MOESM8 [file 9462274]
